# Supplementary material for: DcR3 suppresses the NF-κB pathway and the NLRP3 inflammasome activation in gouty inflammation
Source: PubMed Central journal article supplement — Chin Med J (Engl). 2024 Sep 19;137(21):2644–6. doi: 10.1097/CM9.0000000000003274 (PMC11557038; doi:10.1097/cm9.0000000000003274), 2024-09-19
Supplement: cm9-137-2644-s001.pdf [file cm9-137-2644-s001.pdf]

**Supplementary Table 1: Clinical and laboratory data of the subjects.**

| Items                                       | AG group (n = 40)               | IG group (n = 40)            | HC group (n = 50) |
|---------------------------------------------|---------------------------------|------------------------------|-------------------|
| Age (years)                                 | 40.98 ± 10.75                   | 43.43 ± 11.54                | 43.52 ± 11.86     |
| Gender F/M                                  | 0/40                            | 0/40                         | 0/50              |
| CRP (mg/L) ([M(P25, P75)])                  | 5.01 (2.58–13.78) <sup>†</sup>  | 0.70 (0.32–2.32)             | —                 |
| ESR (mm/h) ([M(P25, P75)])                  | 15.50 (6.25–22.00) <sup>†</sup> | 5.00 (2.00–11.75)            | —                 |
| WBC (×10 <sup>9</sup> /L) ( $\bar{x}$ ± SD) | 8.23 ± 2.62 <sup>*,†</sup>      | 7.07 ± 2.08 <sup>*</sup>     | 5.77 ± 1.22       |
| GR (×10 <sup>9</sup> /L) ( $\bar{x}$ ± SD)  | 5.49 ± 2.20 <sup>*,†</sup>      | 4.44 ± 2.08 <sup>*</sup>     | 3.47 ± 0.98       |
| LY (×10 <sup>9</sup> /L) ( $\bar{x}$ ± SD)  | 2.07 ± 0.73                     | 2.04 ± 0.75                  | 1.79 ± 0.46       |
| Mo (×10 <sup>9</sup> /L) ( $\bar{x}$ ± SD)  | 0.48 ± 0.20 <sup>*,†</sup>      | 0.39 ± 0.12 <sup>*</sup>     | 0.32 ± 0.10       |
| sUA (μmol/L) ( $\bar{x}$ ± SD)              | 528.31 ± 133.91 <sup>*</sup>    | 528.80 ± 131.93 <sup>*</sup> | 350.48 ± 46.16    |
| GLU (mmol/L) ( $\bar{x}$ ± SD)              | 5.18 ± 0.56                     | 5.35 ± 0.94                  | 5.31 ± 0.88       |
| TG (mmol/L) ( $\bar{x}$ ± SD)               | 2.34 ± 0.99 <sup>*</sup>        | 2.61 ± 1.71 <sup>*</sup>     | 1.18 ± 0.68       |
| TC (mmol/L) ( $\bar{x}$ ± SD)               | 5.08 ± 0.84                     | 4.69 ± 0.91                  | 4.75 ± 0.70       |
| HDL (mmol/L) ( $\bar{x}$ ± SD)              | 1.03 ± 0.17 <sup>*</sup>        | 1.05 ± 0.24 <sup>*</sup>     | 1.33 ± 0.55       |
| LDL (mmol/L) ( $\bar{x}$ ± SD)              | 3.03 ± 0.75 <sup>*,†</sup>      | 2.61 ± 0.79                  | 2.63 ± 0.55       |
| VLDL (mmol/L) ( $\bar{x}$ ± SD)             | 1.03 ± 0.67                     | 1.03 ± 0.57                  | 0.84 ± 0.30       |

[M(P25, P75)], Median (25th percentile, 75th percentile);  $\bar{x}$  ± SD: Mean ± standard deviation; AG: Acute gout; CRP: C-reactive protein; ESR: Erythrocyte sedimentation rate; F: Female; GLU: Serum glucose; GR: Granulocyte; HC: Healthy controls; HDL: High-density lipoprotein; IG: Intercritical gout; LDL: Low-density lipoprotein; LY: Lymphocyte counts; M: Male; Mo: Monocyte counts; sUA: Serum uric acid; TC: Total cholesterol; TG: Triglycerides; VLDL: Very low-density lipoprotein; WBC: White blood cell counts.

\**P* < 0.05 (in comparison with the HC group).

<sup>†</sup>*P* < 0.05 (in comparison with the IG group).

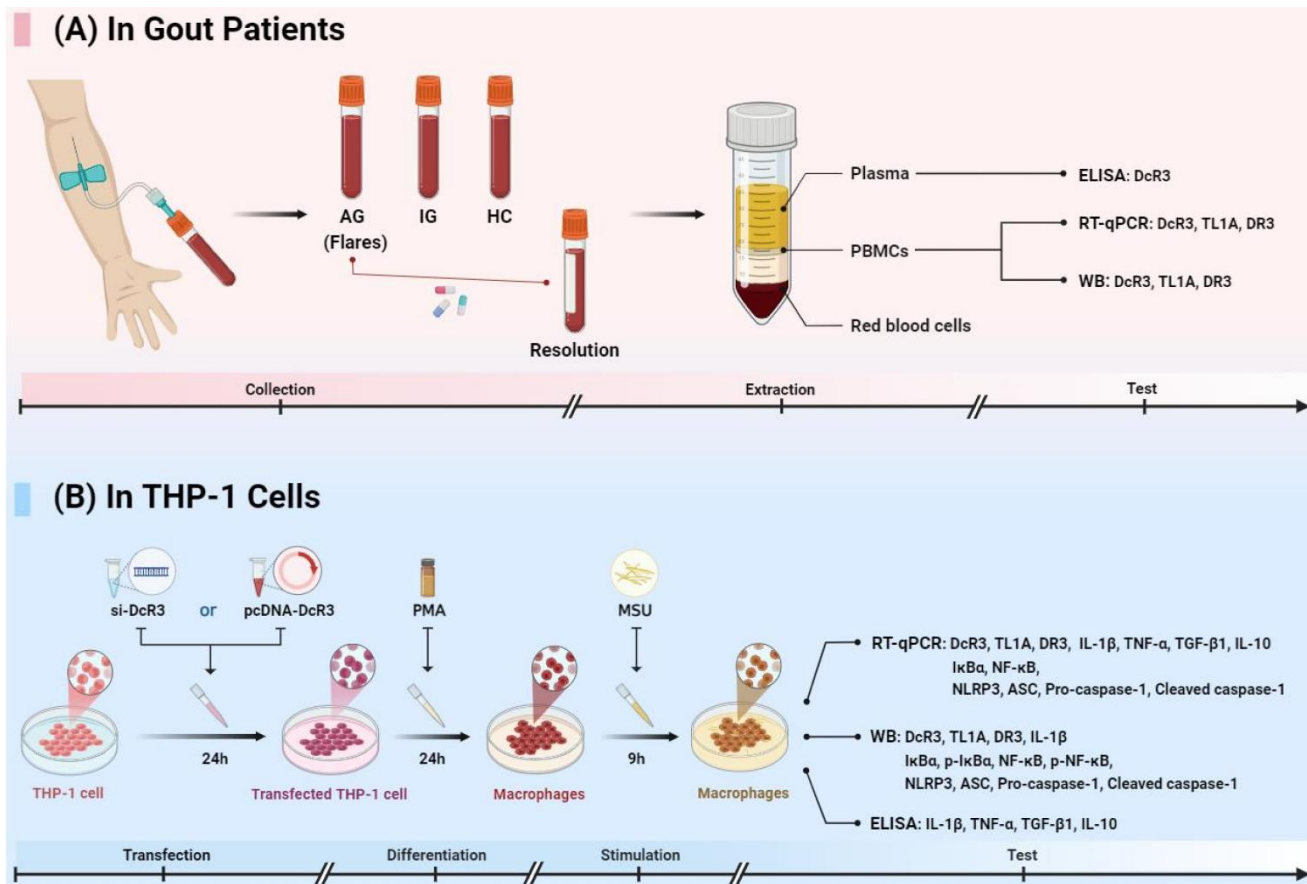

**Supplementary Figure 1: Overview of experimental procedure.**

(A) In gout patients (B) In THP-1 cells. AG, acute gout; IG, intercritical gout; HC, healthy controls; PBMCs, peripheral blood mononuclear cells; DcR3, Decoy receptor 3; TL1A, Human tumor necrosis factor-related ligand 1A; DR3, Death receptor 3; si-DcR3, DcR3-specific small interfering RNA; pcDNA-DcR3, overexpression plasmid of DcR3; PMA, phorbol-12-myristate-13-acetate; MSU, monosodium urate; IL-1 $\beta$ , Interleukin-1 $\beta$ ; TNF- $\alpha$ , tumor necrosis factor; TGF- $\beta$ 1, transforming growth factor- $\beta$ 1; IL-10, Interleukin-10; I $\kappa$ B $\alpha$ , inhibitor kappa B alpha; p-I $\kappa$ B $\alpha$ , Phospho-inhibitor kappa B alpha; NF $\kappa$ B, Nuclear factor kappa-B; p-NF $\kappa$ B, Phospho- Nuclear factor kappa-B; NLRP3, Nucleotide-binding oligomerization domain receptor protein 3; ASC, apoptosis-associated speck-like protein.

A

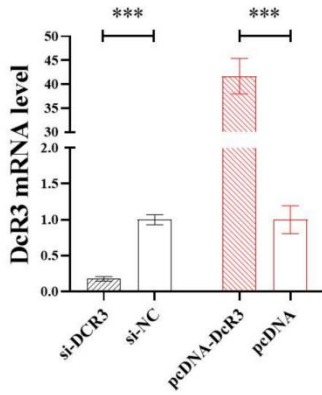

B

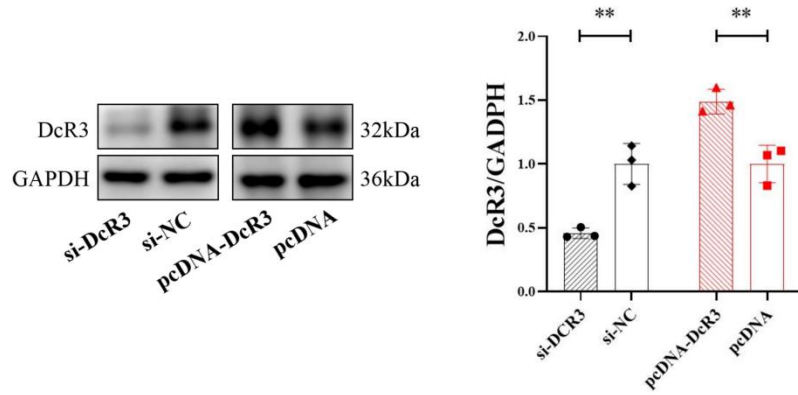

**Supplementary Figure 2: Transfection efficiency of si-DcR3 or pcDNA-DcR3.**

Transfection of si-DcR3 or pcDNA-DcR3 for 24 hours decreased or increased the expression of DcR3 mRNA and protein in THP-1 cells. \*  $P < 0.05$ ; \*\*  $P < 0.01$ ; \*\*\*  $P < 0.001$ . DcR3, Decoy receptor 3; si-DcR3, DcR3-specific small interfering RNA; pcDNA-DcR3, overexpression plasmid of DcR3.

A

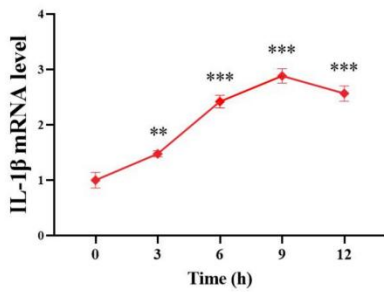

B

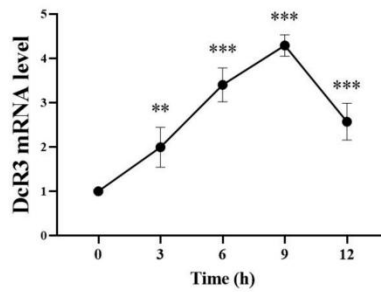

C

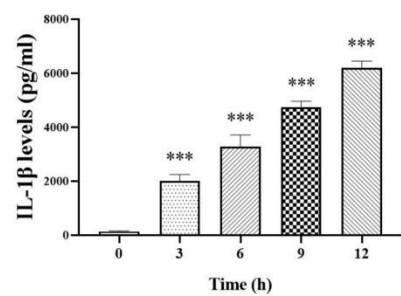

D

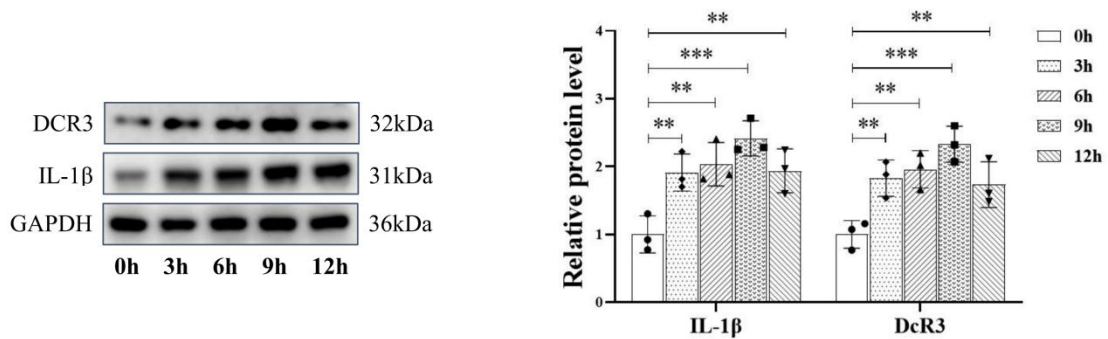

**Supplementary Figure 3: Altered expression of DcR3 and IL-1 $\beta$  in MSU-induced THP-1 cells inflammation.**

(A, D) Altered expression of IL-1 $\beta$  mRNA and protein upon stimulation of THP-1 cells in comparison with that of unstimulated control cultures. (C) Altered expression of IL-1 $\beta$  protein concentration in the culture supernatants upon stimulation of THP-1 cells in comparison with that of unstimulated control cultures. (B, D) Altered expression of DcR3 mRNA and protein upon stimulation of THP-1 cells in comparison with that of unstimulated control cultures. \*  $P < 0.05$ ; \*\*  $P < 0.01$ ; \*\*\*  $P < 0.001$ . IL-1 $\beta$ , Interleukin-1 $\beta$ ; DcR3, Decoy receptor 3; MSU, monosodium urate.
